# Supplementary material for: Correction: Eps8 Regulates Axonal Filopodia in Hippocampal Neurons in Response to Brain-Derived Neurotrophic Factor (BDNF)
Source: PubMed Central journal article supplement (PMC4454587; doi:10.1371/journal.pbio.1002184), 2015-06-03

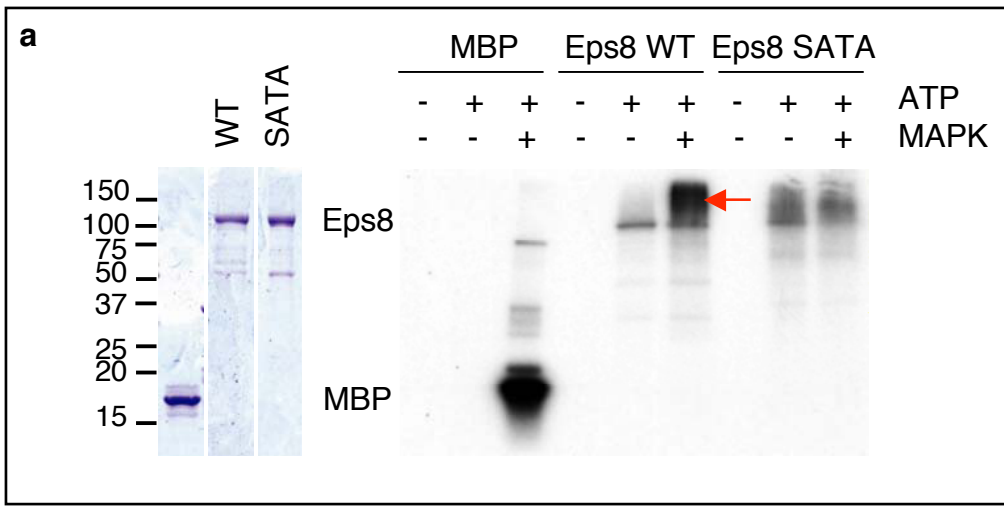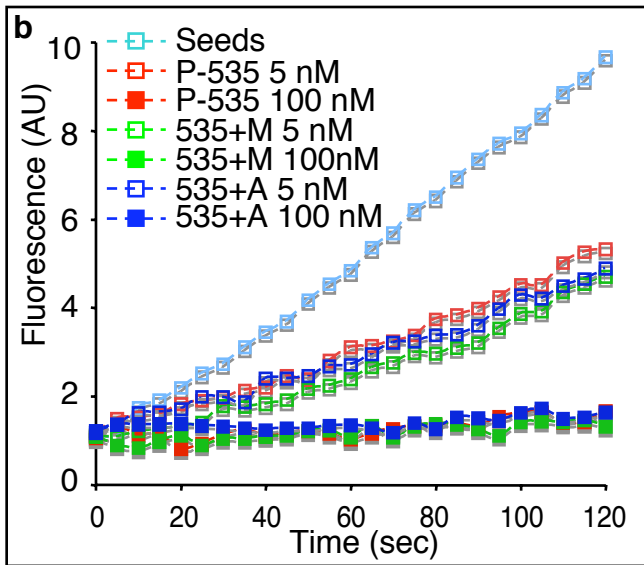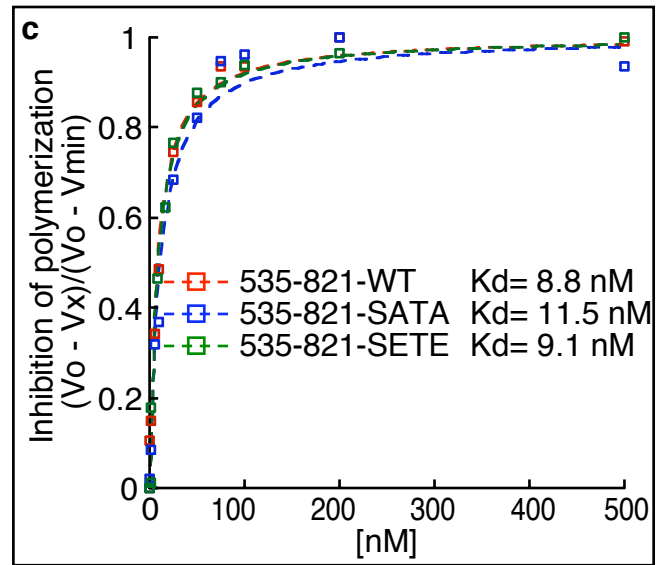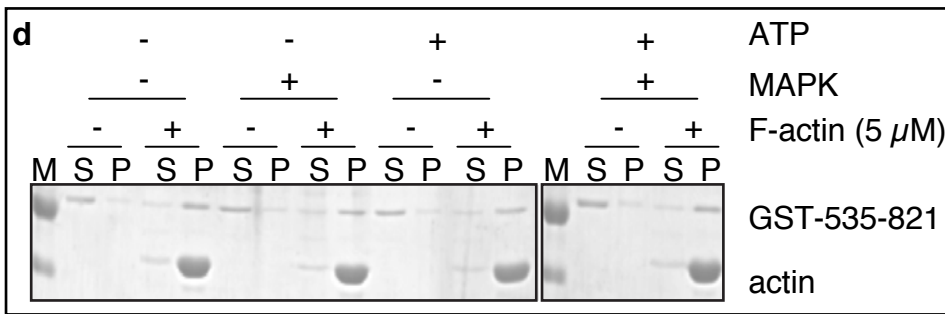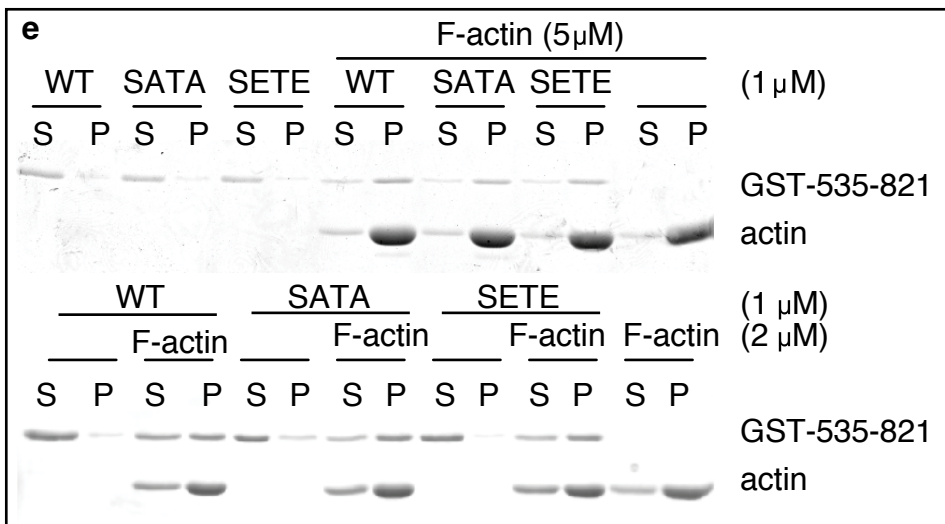

Supplement: pbio.1002184.s001.pdf [file pbio.1002184.s001.pdf]
